# Supplementary material
Source: Springer Nature journal article supplement (https://www.springermedizin.de/resource/supplementary/13018_2006_33_MOESM3_ESM.pdf/9636182)

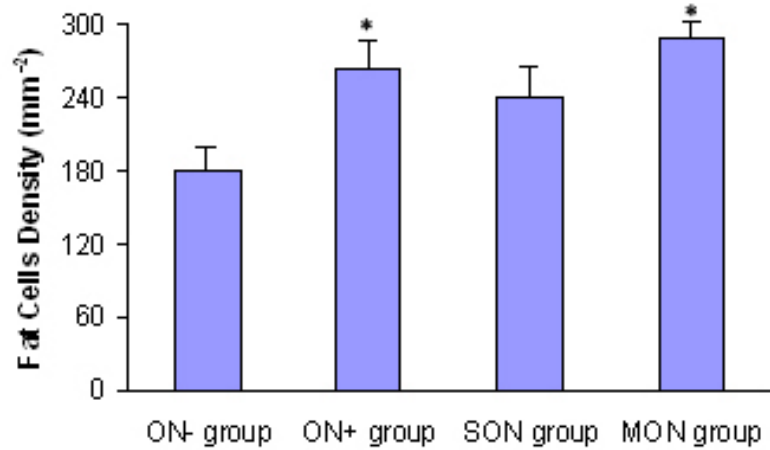

A

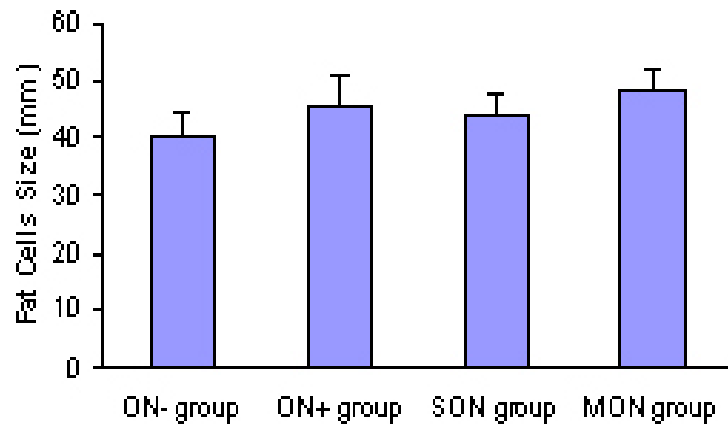

B

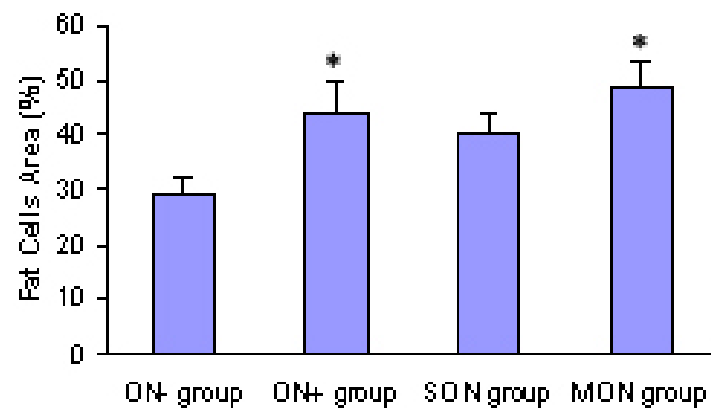

C

Supplement: MOESM3 [file 9636182]
